# Supplementary material for: Intermolecular Halogen Bond Detected in Racemic and Optically Pure N-C Axially Chiral 3-(2-Halophenyl)quinazoline-4-thione Derivatives
Source: MDPI journal article supplement (doi:10.3390/molecules27072369), 2022-04-06
Supplement: s1 [file s1]

## Supplementary Materials

### Intermolecular halogen bond detected in racemic and optically pure N-C axially chiral 3-(2-halophenyl)quinazoline-4-thione derivatives

Ryosuke Matsui,<sup>1</sup> Erina Nijima,<sup>1</sup> Tomomi Imai,<sup>1</sup> Hiroyuki Kobayashi,<sup>2</sup> Akiko Hori,<sup>2</sup> Azusa Sato,<sup>3</sup> Yuko Nakamura<sup>3</sup> and Osamu Kitagawa\*<sup>1</sup>

<sup>1</sup> Department of Applied Chemistry (Japanese Association of Bio-intelligence for Well-being), Shibaura institute of Technology, 3-7-5 Toyosu, Kohto-ku, Tokyo, 135-8548, Japan.

<sup>2</sup> Graduate School of Engineering and Science, Shibaura Institute of Technology, 307 Fukasaku, Minuma-ku, Saitama 337-8570, Japan.

<sup>3</sup> Division of Basic Sciences, Center for Medical and Nursing Education, Tokyo Women's Medical University, 8-1 Kawada-cho, Shinjuku-ku, 162-8666 Tokyo, Japan

AUTHOR E-MAIL ADDRESS: [kitagawa@shibaura-it.ac.jp](mailto:kitagawa@shibaura-it.ac.jp)

#### (Contents)

|                                                                                                                                   |          |
|-----------------------------------------------------------------------------------------------------------------------------------|----------|
| Copies of <sup>1</sup> H- and <sup>13</sup> C-NMR chart of compound <b>2c</b>                                                     | S2       |
| CheckCIF of <i>rac-2a</i> , <i>rac-2b</i> , ( <i>P</i> )- <b>2b</b> and <i>rac-2c</i>                                             | S3-S18   |
| Hirshfeld Surface analyses of <i>rac-2a</i> , ( <i>P</i> )- <b>2a</b> , <i>rac-2b</i> , ( <i>P</i> )- <b>2b</b> and <i>rac-2c</i> | S-19-S20 |

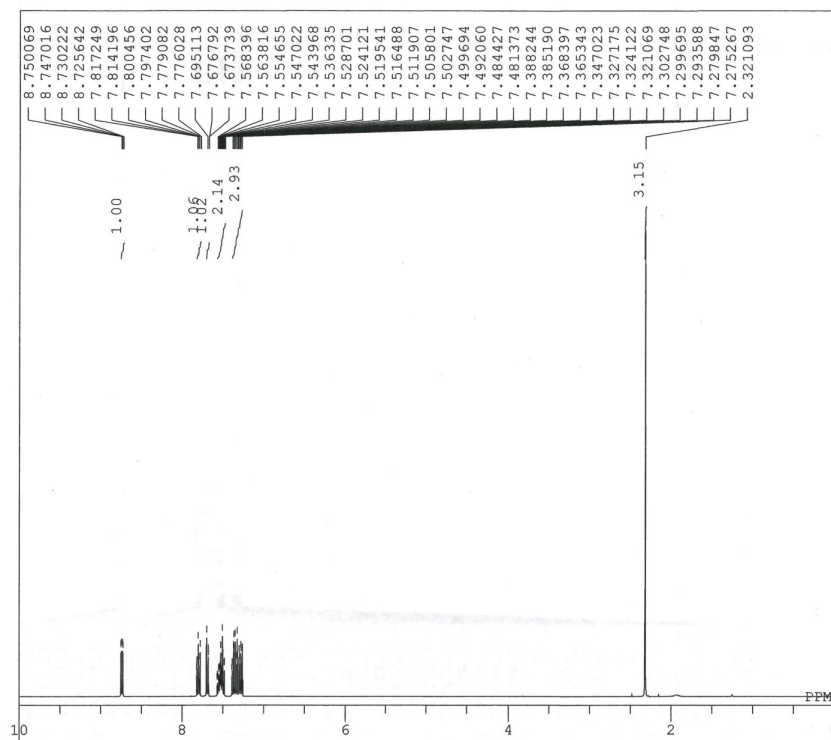

DFILE RM021 20210123-1.als  
 COMNT Qn-BOC 1H  
 DATIM 2021-01-23 15:35:34  
 OBNUC 1H  
 EXMOD single\_pulse.ex2  
 OBFRQ 399.78 MHz  
 OBSET 5.19 KHz  
 OBFIN 6.74 Hz  
 POINT 13107  
 FREQU 7999.88 Hz  
 SCANS 32  
 ACQTM 1.6384 sec  
 PD 5.0000 sec  
 PW1 5.17 usec  
 IRNUC 1H  
 CTEMP 16.9 c  
 SLVNT CDCL3  
 EXREF 7.26 ppm  
 BF 0.12 Hz  
 RGAIN 34

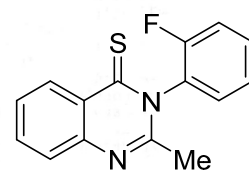

**2c**

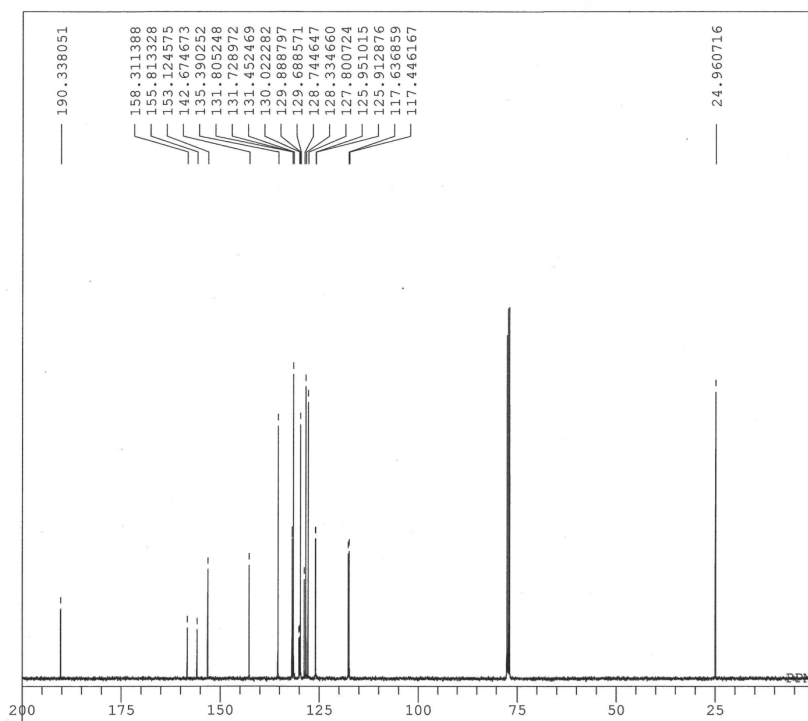

DFILE RM021 20210123 C NMR-1.a  
 COMNT  
 DATIM 2021-01-23 11:03:07  
 OBNUC 13C  
 EXMOD single\_pulse\_dec  
 OBFRQ 100.53 MHz  
 OBSET 5.35 KHz  
 OBFIN 5.86 Hz  
 POINT 26214  
 FREQU 25125.24 Hz  
 SCANS 1024  
 ACQTM 1.0433 sec  
 PD 2.0000 sec  
 PW1 2.87 usec  
 IRNUC 1H  
 CTEMP 17.4 c  
 SLVNT CDCL3  
 EXREF 77.01 ppm  
 BF 1.20 Hz  
 RGAIN 60

**Figure S1.**  $^1\text{H}$ -NMR and  $^{13}\text{C}$ -NMR spectra of compound **2c**.

## CheckCIF/PLATON report

**rac-2a**

Structure factors have been supplied for datablock(s) en191206b\_1\_Pbca\_a

THIS REPORT IS FOR GUIDANCE ONLY. IF USED AS PART OF A REVIEW PROCEDURE FOR PUBLICATION, IT SHOULD NOT REPLACE THE EXPERTISE OF AN EXPERIENCED CRYSTALLOGRAPHIC REFEREE.

No syntax errors found. CIF dictionary Interpreting this report

**Table S1. Datablock: en191206b\_1\_Pbca\_a**

|                 |                 |                 |                    |
|-----------------|-----------------|-----------------|--------------------|
| Bond precision: | C-C = 0.0030 Å  |                 | Wavelength=0.71073 |
| Cell:           | a=13.9862(4)    | b=11.8103(4)    | c=16.7044(5)       |
|                 | alpha=90        | beta=90         | gamma=90           |
| Temperature:    | 100 K           |                 |                    |
|                 | Calculated      | Reported        |                    |
| Volume          | 2759.25(15)     | 2759.25(15)     |                    |
| Space group     | P b c a         | P b c a         |                    |
| Hall group      | -P 2ac 2ab      | -P 2ac 2ab      |                    |
| Moiety formula  | C15 H11 Br N2 S | C15 H11 Br N2 S |                    |
| Sum formula     | C15 H11 Br N2 S | C15 H11 Br N2 S |                    |
| Mr              | 331.22          | 331.23          |                    |
| Dx,g cm-3       | 1.595           | 1.595           |                    |
| Z               | 8               | 8               |                    |
| Mu (mm-1)       | 3.117           | 3.117           |                    |
| F000            | 1328.0          | 1328.0          |                    |
| F000'           | 1327.09         |                 |                    |
| h,k,lmax        | 16,14,19        | 16,14,19        |                    |
| Nref            | 2437            | 2435            |                    |
| Tmin,Tmax       | 0.502,0.746     | 0.500,0.760     |                    |
| Tmin'           | 0.447           |                 |                    |

Correction method= # Reported T Limits: Tmin=0.500 Tmax=0.760

AbsCorr = MULTI-SCAN

Data completeness= 0.999

Theta(max)= 25.026

R(reflections)= 0.0203( 2147)

wR2(reflections)=  
0.0496( 2435)

S = 1.030

Npar= 173

**Table S2.** The following ALERTS were generated. Each ALERT has the format **test-name\_ALERT\_alert-type\_alert-level**.

Click on the hyperlinks for more details of the test.

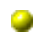

#### Alert level C

PLAT431\_ALERT\_2\_C Short Inter HL..A Contact Br1 ..S1 . 3.41 Ang.  
1/2-x,1/2+y,z = 8\_665 Check

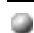

#### Alert level G

|                                                                    |        |       |
|--------------------------------------------------------------------|--------|-------|
| PLAT380_ALERT_4_G Incorrectly? Oriented X(sp2)-Methyl Moiety ..... | C9     | Check |
| PLAT883_ALERT_1_G No Info/Value for _atom_sites_solution_primary . | Please | Do !  |
| PLAT909_ALERT_3_G Percentage of I>2sig(I) Data at Theta(Max) Still | 76%    | Note  |
| PLAT910_ALERT_3_G Missing # of FCF Reflection(s) Below Theta(Min). | 1      | Note  |
| PLAT933_ALERT_2_G Number of HKL-OMIT Records in Embedded .res File | 1      | Note  |
| PLAT978_ALERT_2_G Number C-C Bonds with Positive Residual Density. | 13     | Info  |

0 **ALERT level A** = Most likely a serious problem - resolve or explain

0 **ALERT level B** = A potentially serious problem, consider carefully

1 **ALERT level C** = Check. Ensure it is not caused by an omission or oversight

6 **ALERT level G** = General information/check it is not something unexpected

1 ALERT type 1 CIF construction/syntax error, inconsistent or missing data

3 ALERT type 2 Indicator that the structure model may be wrong or deficient

2 ALERT type 3 Indicator that the structure quality may be low

1 ALERT type 4 Improvement, methodology, query or suggestion

0 ALERT type 5 Informative message, check

It is advisable to attempt to resolve as many as possible of the alerts in all categories. Often the minor alerts point to easily fixed oversights, errors and omissions in your CIF or refinement strategy, so attention to these fine details can be worthwhile. In order to resolve some of the more serious problems it may be necessary to carry out additional measurements or structure refinements. However, the purpose of your study may justify the reported deviations and the more serious of these should normally be commented upon in the discussion or experimental section of a paper or in the "special\_details" fields of the CIF. checkCIF was carefully designed to identify outliers and unusual parameters, but every test has its limitations and alerts that are not important in a particular case may appear. Conversely, the absence of alerts does not guarantee there are no aspects of the results needing attention. It is up to the individual to critically assess their own results and, if necessary, seek expert advice.

### **Publication of your CIF in IUCr journals**

A basic structural check has been run on your CIF. These basic checks will be run on all CIFs submitted for publication in IUCr journals (*Acta Crystallographica*, *Journal of Applied Crystallography*, *Journal of Synchrotron Radiation*); however, if you intend to submit to *Acta Crystallographica Section C* or *E* or *IUCrData*, you should make sure that full publication checks are run on the final version of your CIF prior to submission.

### **Publication of your CIF in other journals**

Please refer to the *Notes for Authors* of the relevant journal for any special instructions relating to CIF submission.

---

**PLATON version of 18/12/2021; check.def file version of 18/12/2021**

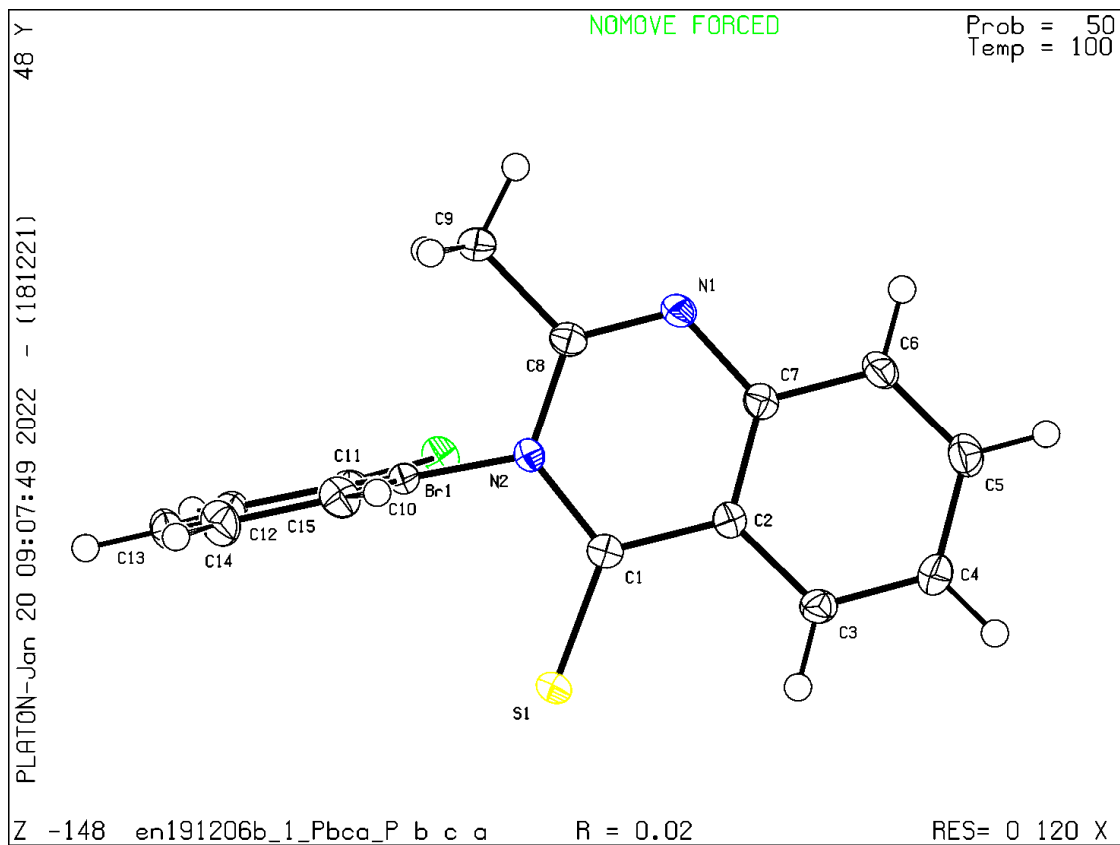

**Figure S2.** Datablock en191206b\_1\_Pbca\_a - ellipsoid plot (*rac*-2a).

**rac-2b**

Structure factors have been supplied for datablock(s) Pbca2\_a

THIS REPORT IS FOR GUIDANCE ONLY. IF USED AS PART OF A REVIEW PROCEDURE FOR PUBLICATION, IT SHOULD NOT REPLACE THE EXPERTISE OF AN EXPERIENCED CRYSTALLOGRAPHIC REFEREE.

No syntax errors found. CIF dictionary Interpreting this report

**Table S3. Datablock: Pbca2\_a**

|                        |                 |                 |                    |
|------------------------|-----------------|-----------------|--------------------|
| Bond precision:        | C-C = 0.0020 Å  |                 | Wavelength=0.71073 |
| Cell:                  | a=14.1210(16)   | b=11.5800(14)   | c=16.6932(17)      |
|                        | alpha=90        | beta=90         | gamma=90           |
| Temperature:           | 100 K           |                 |                    |
|                        | Calculated      | Reported        |                    |
| Volume                 | 2729.7(5)       | 2729.7(5)       |                    |
| Space group            | P b c a         | P b c a         |                    |
| Hall group             | -P 2ac 2ab      | -P 2ac 2ab      |                    |
| Moiety formula         | C15 H11 Cl N2 S | C15 H11 Cl N2 S |                    |
| Sum formula            | C15 H11 Cl N2 S | C15 H11 Cl N2 S |                    |
| Mr                     | 286.77          | 286.77          |                    |
| Dx, g cm <sup>-3</sup> | 1.396           | 1.396           |                    |
| Z                      | 8               | 8               |                    |
| Mu (mm <sup>-1</sup> ) | 0.419           | 0.419           |                    |
| F000                   | 1184.0          | 1184.0          |                    |
| F000'                  | 1186.50         |                 |                    |
| h,k,lmax               | 16,13,19        | 16,13,19        |                    |
| Nref                   | 2406            | 2403            |                    |
| Tmin,Tmax              | 0.875,0.899     | 0.700,0.900     |                    |
| Tmin'                  | 0.875           |                 |                    |

Correction method= # Reported T Limits: Tmin=0.700 Tmax=0.900  
AbsCorr = MULTI-SCAN

Data completeness= 0.999 Theta(max)= 25.023

R(reflections)= 0.0297( 2261) wR2(reflections)=  
0.0840( 2403)

S = 1.054 Npar= 173

---

**Table S4.** The following ALERTS were generated. Each ALERT has the format

**test-name\_ALERT\_alert-type\_alert-level.**

Click on the hyperlinks for more details of the test.

---



**Alert level C**

|                                                                    |    |      |         |     |      |
|--------------------------------------------------------------------|----|------|---------|-----|------|
| PLAT230_ALERT_2_C Hirshfeld Test Diff for                          | S1 | --C1 | .       | 6.1 | s.u. |
| PLAT934_ALERT_3_C Number of (Iobs-Icalc)/Sigma(W) > 10 Outliers .. |    |      | 1 Check |     |      |

---

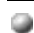

**Alert level G**

|                                                                    |        |       |   |
|--------------------------------------------------------------------|--------|-------|---|
| PLAT883_ALERT_1_G No Info/Value for _atom_sites_solution_primary . | Please | Do    | ! |
| PLAT909_ALERT_3_G Percentage of I>2sig(I) Data at Theta(Max) Still | 88%    | Note  |   |
| PLAT910_ALERT_3_G Missing # of FCF Reflection(s) Below Theta(Min). | 3      | Note  |   |
| PLAT933_ALERT_2_G Number of HKL-OMIT Records in Embedded .res File | 3      | Note  |   |
| PLAT965_ALERT_2_G The SHELXL WEIGHT Optimisation has not Converged | Please | Check |   |
| PLAT978_ALERT_2_G Number C-C Bonds with Positive Residual Density. | 8      | Info  |   |

---

0 **ALERT level A** = Most likely a serious problem - resolve or explain

0 **ALERT level B** = A potentially serious problem, consider carefully

2 **ALERT level C** = Check. Ensure it is not caused by an omission or oversight

6 **ALERT level G** = General information/check it is not something unexpected

|   |       |      |   |                                                              |
|---|-------|------|---|--------------------------------------------------------------|
| 1 | ALERT | type | 1 | CIF construction/syntax error, inconsistent or missing data  |
| 4 | ALERT | type | 2 | Indicator that the structure model may be wrong or deficient |
| 3 | ALERT | type | 3 | Indicator that the structure quality may be low              |
| 0 | ALERT | type | 4 | Improvement, methodology, query or suggestion                |
| 0 | ALERT | type | 5 | Informative message, check                                   |

---



---



It is advisable to attempt to resolve as many as possible of the alerts in all categories. Often the minor alerts point to easily fixed oversights, errors and omissions in your CIF or refinement strategy, so attention to these fine details can be worthwhile. In order to resolve some of the more serious problems it may be necessary to carry out additional measurements or structure refinements. However, the purpose of your study may justify the reported deviations and the more serious of these should normally be commented upon in the discussion or experimental section of a paper or in the "special\_details" fields of the CIF. checkCIF was carefully designed to identify outliers and unusual parameters, but every test has its limitations and alerts that are not important in a particular case may appear. Conversely, the absence of alerts does not guarantee there are no aspects of the results needing attention. It is up to the individual to critically assess their own results and, if necessary, seek expert advice.

### **Publication of your CIF in IUCr journals**

A basic structural check has been run on your CIF. These basic checks will be run on all CIFs submitted for publication in IUCr journals (*Acta Crystallographica*, *Journal of Applied Crystallography*, *Journal of Synchrotron Radiation*); however, if you intend to submit to *Acta Crystallographica Section C* or *E* or *IUCrData*, you should make sure that full publication checks are run on the final version of your CIF prior to submission.

### **Publication of your CIF in other journals**

Please refer to the *Notes for Authors* of the relevant journal for any special instructions relating to CIF submission.

---

**PLATON version of 18/12/2021; check.def file version of 18/12/2021**

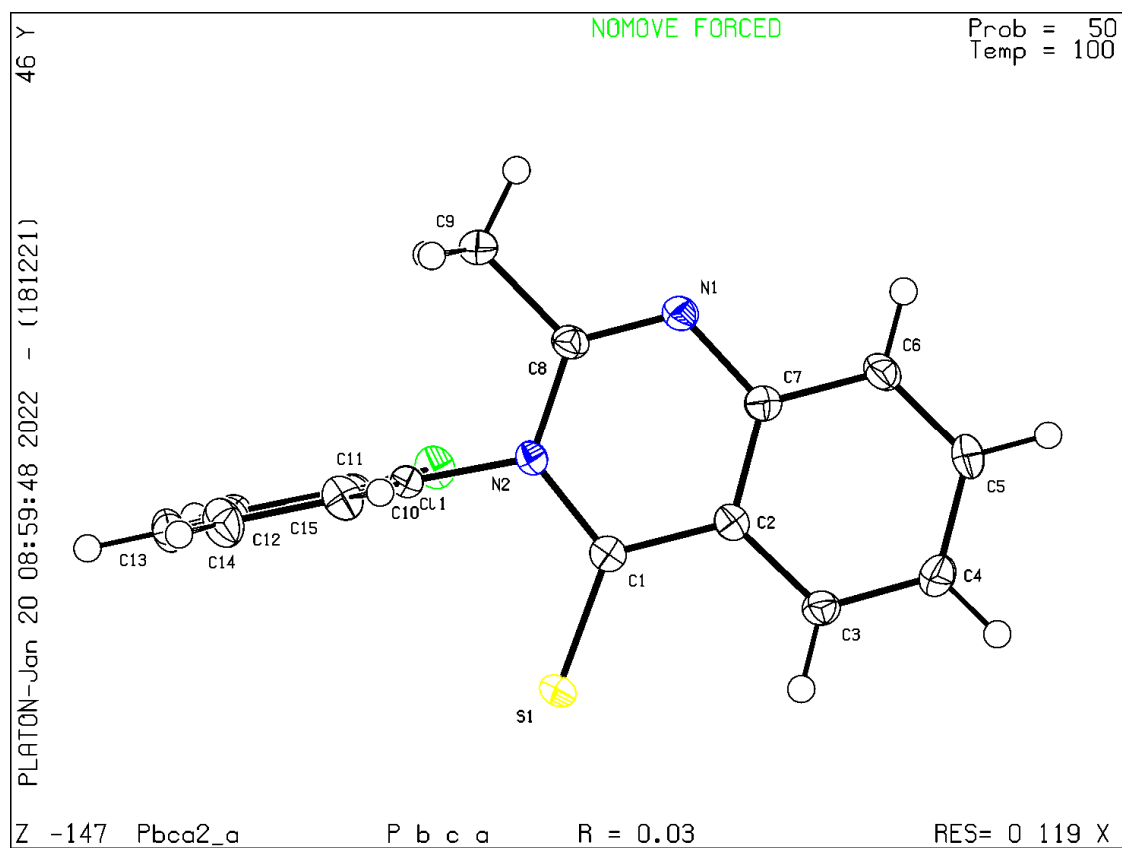

**Figure S3. Datablock Pbca2\_a - ellipsoid plot (rac-2b).**

**(P)-2b**

Structure factors have been supplied for datablock(s) P21\_a

THIS REPORT IS FOR GUIDANCE ONLY. IF USED AS PART OF A REVIEW PROCEDURE FOR PUBLICATION, IT SHOULD NOT REPLACE THE EXPERTISE OF AN EXPERIENCED CRYSTALLOGRAPHIC REFEREE.

No syntax errors found. CIF dictionary Interpreting this report

**Table S5. Datablock: P21\_a**

|                 |                 |                 |                    |
|-----------------|-----------------|-----------------|--------------------|
| Bond precision: | C-C = 0.0041 Å  |                 | Wavelength=0.71073 |
| Cell:           | a=8.3918(7)     | b=16.9928(15)   | c=10.0448(10)      |
|                 | alpha=90        | beta=111.646    | gamma=90           |
| Temperature:    | 100 K           |                 |                    |
|                 | Calculated      | Reported        |                    |
| Volume          | 1331.4(2)       | 1331.4(2)       |                    |
| Space group     | P 21            | P 21            |                    |
| Hall group      | P 2yb           | P 2yb           |                    |
| Moiety formula  | C15 H11 Cl N2 S | C15 H11 Cl N2 S |                    |
| Sum formula     | C15 H11 Cl N2 S | C15 H11 Cl N2 S |                    |
| Mr              | 286.77          | 286.77          |                    |
| Dx,g cm-3       | 1.431           | 1.431           |                    |
| Z               | 4               | 4               |                    |
| Mu (mm-1)       | 0.429           | 0.429           |                    |
| F000            | 592.0           | 592.0           |                    |
| F000'           | 593.25          |                 |                    |
| h,k,lmax        | 9,20,11         | 9,20,11         |                    |
| Nref            | 4690 [2431]     | 4472            |                    |
| Tmin,Tmax       | 0.897,0.934     | 0.770,0.940     |                    |
| Tmin'           | 0.873           |                 |                    |

Correction method= # Reported T Limits: Tmin=0.770 Tmax=0.940  
AbsCorr = MULTI-SCAN

Data completeness= 1.84/0.95 Theta(max)= 25.026

R(reflections)= 0.0256( 4381) wR2(reflections)=  
0.0631( 4472)

S = 1.060 Npar= 345

---

**Table S6.** The following ALERTS were generated. Each ALERT has the format

**test-name\_ALERT\_alert-type\_alert-level.**

Click on the hyperlinks for more details of the test.

---



**Alert level C**

|                                                                 |         |      |          |
|-----------------------------------------------------------------|---------|------|----------|
| PLAT089_ALERT_3_C Poor Data / Parameter Ratio (Zmax < 18) ..... |         | 7.03 | Note     |
| PLAT340_ALERT_3_C Low Bond Precision on C-C Bonds .....         | 0.00407 |      | Ang.     |
| PLAT911_ALERT_3_C Missing FCF Refl Between Thmin & STh/L=       | 0.595   |      | 4 Report |

---

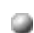

**Alert level G**

|                                                                    |  |        |       |
|--------------------------------------------------------------------|--|--------|-------|
| PLAT380_ALERT_4_G Incorrectly? Oriented X(sp2)-Methyl Moiety ..... |  | C24    | Check |
| PLAT883_ALERT_1_G No Info/Value for _atom_sites_solution_primary . |  | Please | Do !  |
| PLAT909_ALERT_3_G Percentage of I>2sig(I) Data at Theta(Max) Still |  | 96%    | Note  |
| PLAT933_ALERT_2_G Number of HKL-OMIT Records in Embedded .res File |  | 2      | Note  |
| PLAT978_ALERT_2_G Number C-C Bonds with Positive Residual Density. |  | 2      | Info  |

---

0 **ALERT level A** = Most likely a serious problem - resolve or explain

0 **ALERT level B** = A potentially serious problem, consider carefully

3 **ALERT level C** = Check. Ensure it is not caused by an omission or oversight

5 **ALERT level G** = General information/check it is not something unexpected

1 ALERT type 1 CIF construction/syntax error, inconsistent or missing data

2 ALERT type 2 Indicator that the structure model may be wrong or deficient

4 ALERT type 3 Indicator that the structure quality may be low

1 ALERT type 4 Improvement, methodology, query or suggestion

0 ALERT type 5 Informative message, check

---



---

It is advisable to attempt to resolve as many as possible of the alerts in all categories. Often the minor alerts point to easily fixed oversights, errors and omissions in your CIF or refinement strategy, so attention to these fine details can be worthwhile. In order to resolve some of the more serious problems it may be necessary to carry out additional measurements or structure refinements. However, the purpose of your study may justify the reported deviations and the more serious of these should normally be commented upon in the discussion or experimental section of a paper or in the "special\_details" fields of the CIF. checkCIF was carefully designed to identify outliers and unusual parameters, but every test has its limitations and alerts that are not important in a particular case may appear. Conversely, the absence of alerts does not guarantee there are no aspects of the results needing attention. It is up to the individual to critically assess their own results and, if necessary, seek expert advice.

### **Publication of your CIF in IUCr journals**

A basic structural check has been run on your CIF. These basic checks will be run on all CIFs submitted for publication in IUCr journals (*Acta Crystallographica*, *Journal of Applied Crystallography*, *Journal of Synchrotron Radiation*); however, if you intend to submit to *Acta Crystallographica Section C* or *E* or *IUCrData*, you should make sure that full publication checks are run on the final version of your CIF prior to submission.

### **Publication of your CIF in other journals**

Please refer to the *Notes for Authors* of the relevant journal for any special instructions relating to CIF submission.

---

**PLATON version of 18/12/2021; check.def file version of 18/12/2021**

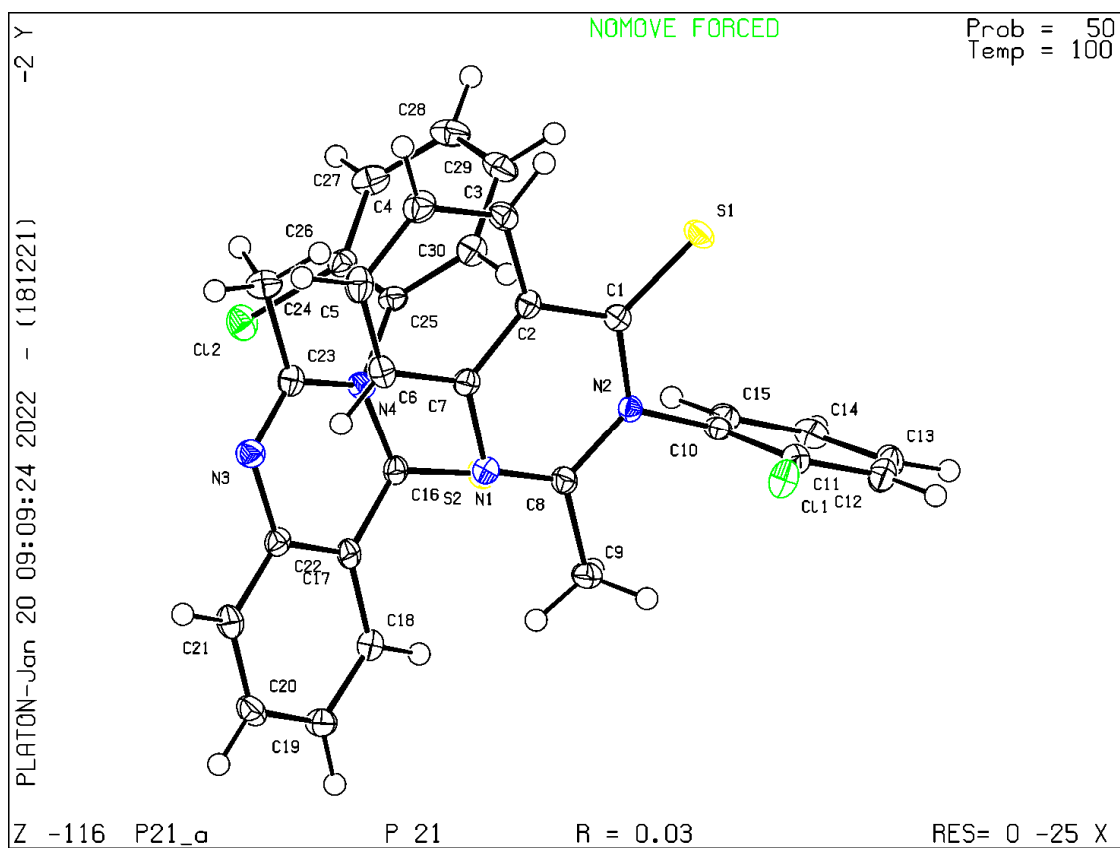

**Figure S4. Datablock P21\_a - ellipsoid plot [(P)-2b].**

**rac-2c**

Structure factors have been supplied for datablock(s) hk201126b

THIS REPORT IS FOR GUIDANCE ONLY. IF USED AS PART OF A REVIEW PROCEDURE FOR PUBLICATION, IT SHOULD NOT REPLACE THE EXPERTISE OF AN EXPERIENCED CRYSTALLOGRAPHIC REFEREE.

No syntax errors found. CIF dictionary Interpreting this report

**Table S7. Datablock: hk201126b**

|                 |                |      |                    |               |
|-----------------|----------------|------|--------------------|---------------|
| Bond precision: | C-C = 0.0030 Å |      | Wavelength=0.71073 |               |
| Cell:           | a=13.3633(19)  |      | b=14.1656(18)      | c=14.7771(18) |
|                 | alpha=90       |      | beta=114.812(4)    | gamma=90      |
| Temperature:    | 100 K          |      |                    |               |
|                 | Calculated     |      | Reported           |               |
| Volume          | 2539.1(6)      |      | 2539.1(6)          |               |
| Space group     | C 2/c          |      | C 2/c              |               |
| Hall group      | -C 2yc         |      | -C 2yc             |               |
| Moiety formula  | C15 H11 F      | N2 S | C15 H11 F          | N2 S          |
| Sum formula     | C15 H11 F      | N2 S | C15 H11 F          | N2 S          |
| Mr              | 270.32         |      | 270.32             |               |
| Dx,g cm-3       | 1.414          |      | 1.414              |               |
| Z               | 8              |      | 8                  |               |
| Mu (mm-1)       | 0.253          |      | 0.253              |               |
| F000            | 1120.0         |      | 1120.0             |               |
| F000'           | 1121.43        |      |                    |               |
| h,k,lmax        | 15,16,17       |      | 15,16,17           |               |
| Nref            | 2247           |      | 2245               |               |
| Tmin,Tmax       | 0.937,0.955    |      | 0.830,0.960        |               |
| Tmin'           | 0.930          |      |                    |               |

Correction method= # Reported T Limits: Tmin=0.830 Tmax=0.960  
AbsCorr = MULTI-SCAN

Data completeness= 0.999 Theta(max)= 25.024

R(reflections)= 0.0352( 2010) wR2(reflections)=  
0.1121( 2245)

S = 1.124 Npar= 173

**Table S8.** The following ALERTS were generated. Each ALERT has the format  
**test-name\_ALERT\_alert-type\_alert-level.**  
Click on the hyperlinks for more details of the test.



**Alert level C**

|                                                                    |         |   |        |
|--------------------------------------------------------------------|---------|---|--------|
| PLAT911_ALERT_3_C Missing FCF Refl Between Thmin & STh/L=          | 0.595   | 3 | Report |
| PLAT934_ALERT_3_C Number of (Iobs-Icalc)/Sigma(W) > 10 Outliers .. | 1 Check |   |        |



**Alert level G**

|                                                                    |        |       |   |
|--------------------------------------------------------------------|--------|-------|---|
| PLAT883_ALERT_1_G No Info/Value for _atom_sites_solution_primary . | Please | Do    | ! |
| PLAT909_ALERT_3_G Percentage of I>2sig(I) Data at Theta(Max) Still | 76%    | Note  |   |
| PLAT965_ALERT_2_G The SHELXL WEIGHT Optimisation has not Converged | Please | Check |   |
| PLAT978_ALERT_2_G Number C-C Bonds with Positive Residual Density. | 3      | Info  |   |

- 0 **ALERT level A** = Most likely a serious problem - resolve or explain  
0 **ALERT level B** = A potentially serious problem, consider carefully  
2 **ALERT level C** = Check. Ensure it is not caused by an omission or oversight  
4 **ALERT level G** = General information/check it is not something unexpected

- |   |       |      |   |                                                              |
|---|-------|------|---|--------------------------------------------------------------|
| 1 | ALERT | type | 1 | CIF construction/syntax error, inconsistent or missing data  |
| 2 | ALERT | type | 2 | Indicator that the structure model may be wrong or deficient |
| 3 | ALERT | type | 3 | Indicator that the structure quality may be low              |
| 0 | ALERT | type | 4 | Improvement, methodology, query or suggestion                |
| 0 | ALERT | type | 5 | Informative message, check                                   |



It is advisable to attempt to resolve as many as possible of the alerts in all categories. Often the minor alerts point to easily fixed oversights, errors and omissions in your CIF or refinement strategy, so attention to these fine details can be worthwhile. In order to resolve some of the more serious problems it may be necessary to carry out additional measurements or structure refinements. However, the purpose of your study may justify the reported deviations and the more serious of these should normally be commented upon in the discussion or experimental section of a paper or in the "special\_details" fields of the CIF. checkCIF was carefully designed to identify outliers and unusual parameters, but every test has its limitations and alerts that are not important in a particular case may appear. Conversely, the absence of alerts does not guarantee there are no aspects of the results needing attention. It is up to the individual to critically assess their own results and, if necessary, seek expert advice.

### **Publication of your CIF in IUCr journals**

A basic structural check has been run on your CIF. These basic checks will be run on all CIFs submitted for publication in IUCr journals (*Acta Crystallographica*, *Journal of Applied Crystallography*, *Journal of Synchrotron Radiation*); however, if you intend to submit to *Acta Crystallographica Section C* or *E* or *IUCrData*, you should make sure that full publication checks are run on the final version of your CIF prior to submission.

### **Publication of your CIF in other journals**

Please refer to the *Notes for Authors* of the relevant journal for any special instructions relating to CIF submission.

---

**PLATON version of 18/12/2021; check.def file version of 18/12/2021**

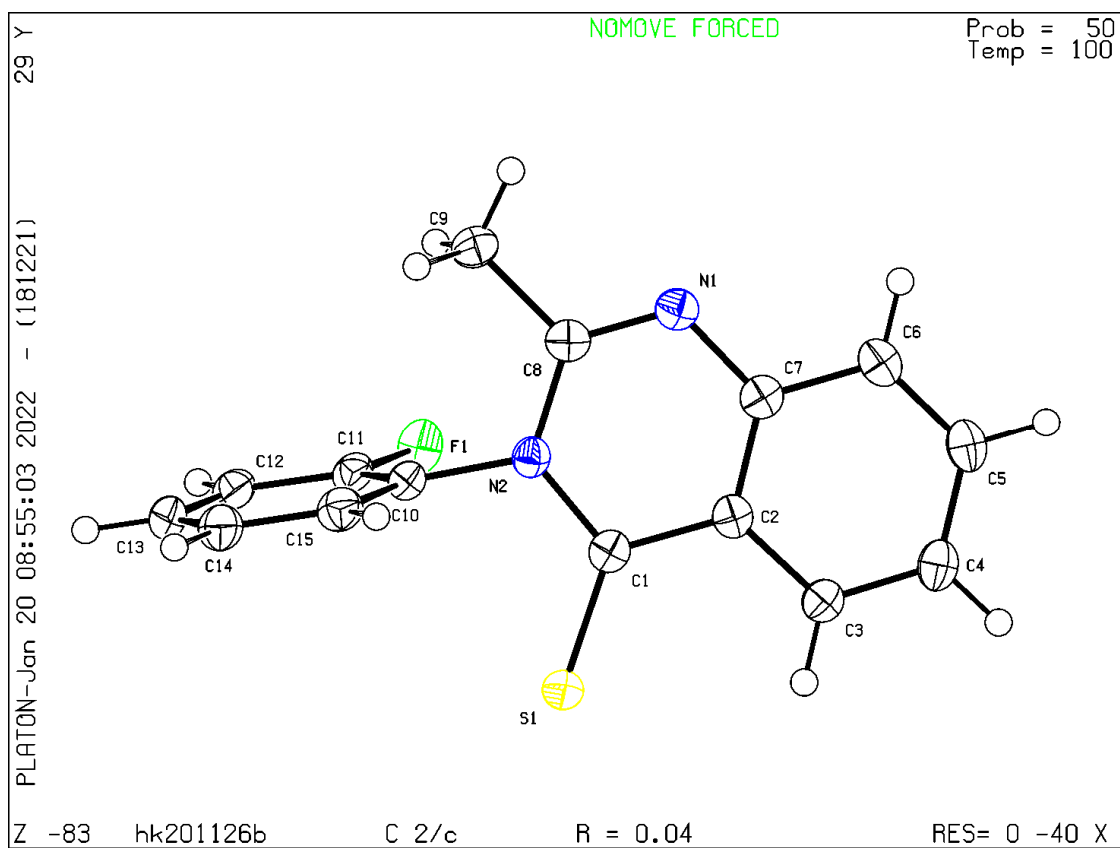

**Figure S5. Datablock hk201126b - ellipsoid plot (rac-2c).**

# Hirshfeld Surface analysis

HS analysis showing intermolecular interactions for sulfur and halogen substituents.

a) (*P*)-**2a**

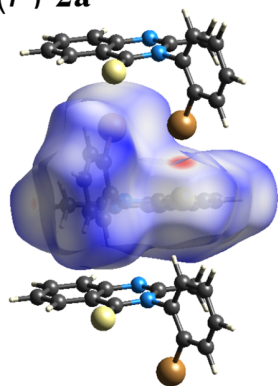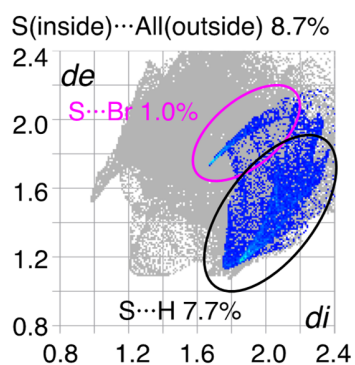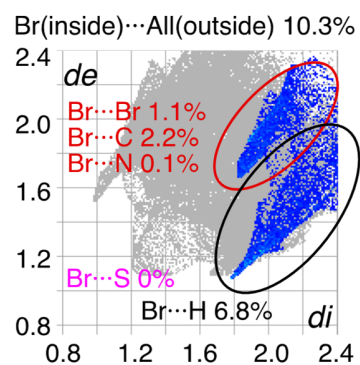

b) (*P*)-**2b**

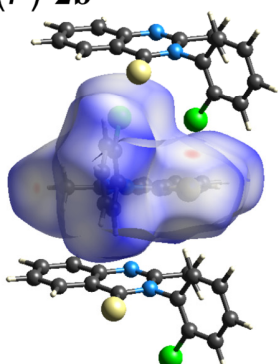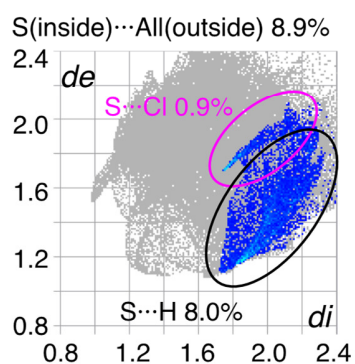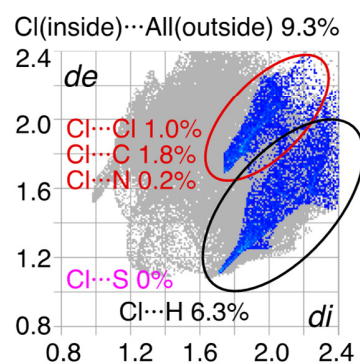

**Figure S6.** The HS mapped with  $d_{\text{norm}}$  and the fingerprint plots of enantiomer a) (*P*)-**2a** and b) (*P*)-**2b** showing the  $d_e$  and  $d_i$  of 0.8–2.4 Å for remarkable interactions [0.5 isovalue of molecular weight function  $w(r)$ ].

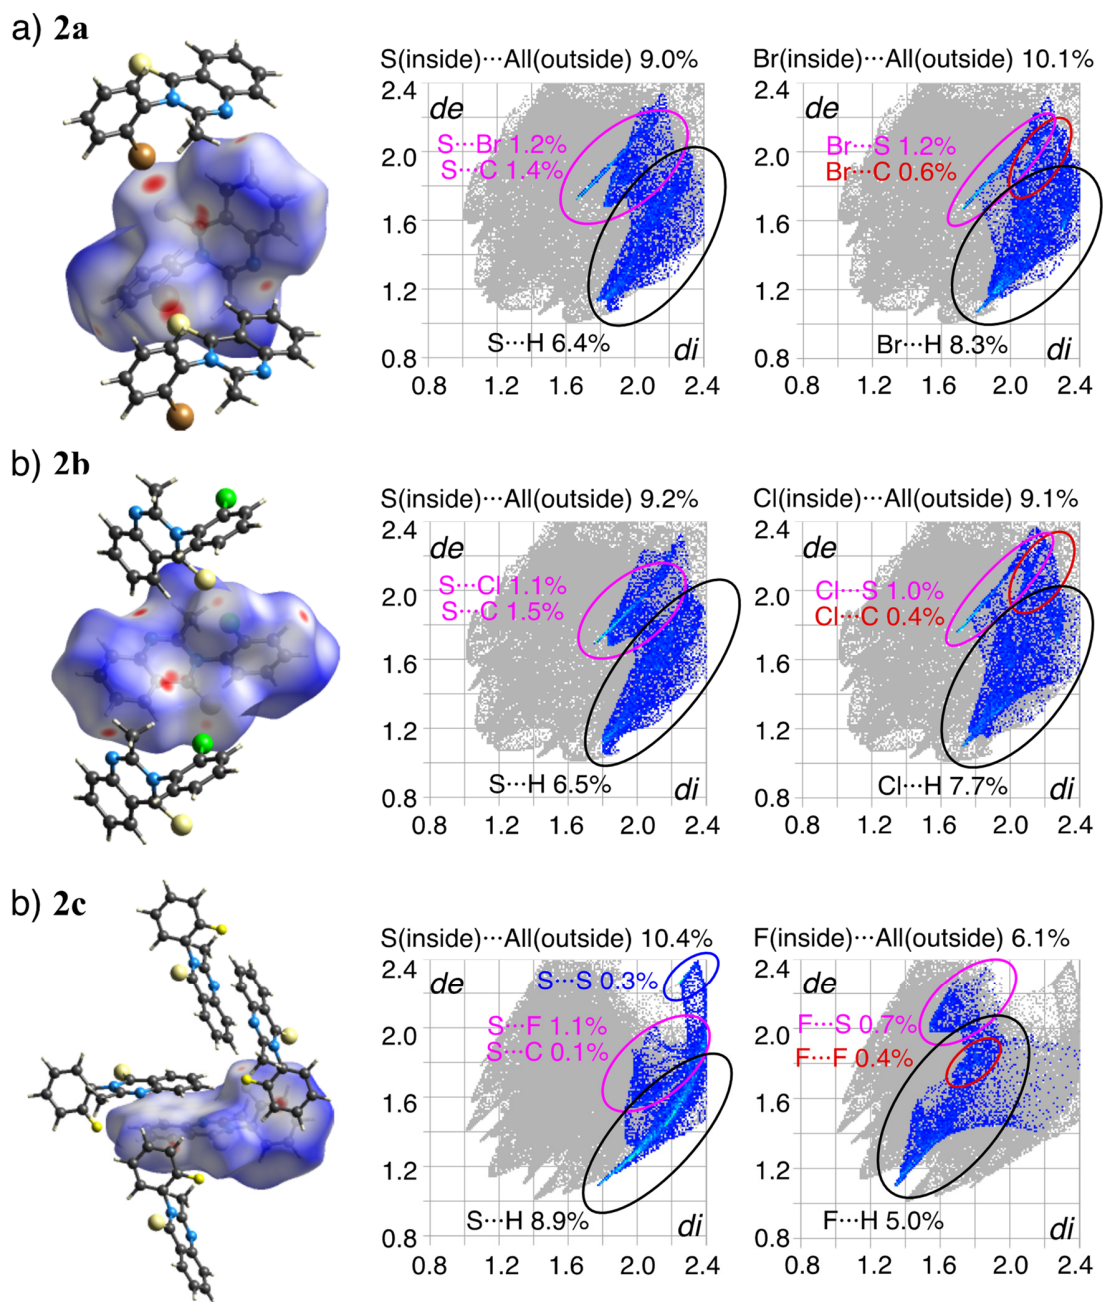

**Figure S7.** The HS mapped with  $d_{\text{norm}}$  and the fingerprint plots of racemic a) racemic **2a**, b) racemic **2b**, and c) racemic **2c** showing the  $d_e$  and  $d_i$  of 0.8-2.4 Å for remarkable interactions [0.5 isovalue of molecular weight function  $w(r)$ ].
